# Supplementary material for: Response patterns of moss to atmospheric nitrogen deposition and nitrogen saturation in an urban-agro-forest transition
Source: Copernicus journal article supplement (doi:10.5194/egusphere-2023-2718), 2023-12-21
Supplement: Supplementary file 1 [file egusphere-2023-2718-supplement.pdf]

**SI**

**Response patterns of moss to atmospheric nitrogen deposition and nitrogen saturation in an urban-agro-forest transition**

Ouping Deng<sup>a,1</sup>, Yuanyuan Chen<sup>a,1</sup>, Jingze Zhao<sup>a</sup>, Xi Li<sup>b</sup>, Wei Zhou<sup>a</sup>, Ting Lan<sup>a</sup>, Dinghua Ou<sup>a</sup>, Yanyan Zhang<sup>a</sup>, Jiang Liu<sup>a</sup>, Ling Luo<sup>c</sup>, Yueqiang He<sup>a</sup>, Hanqing Yang<sup>d</sup>, Rong Huang<sup>a,\*</sup>

<sup>a</sup> College of Resources, Sichuan Agricultural University, Chengdu 611130, P. R. China

<sup>b</sup> Ecological Environment Monitoring Station of Sichuan Province, Chengdu 610031, P.R. China

<sup>c</sup> College of Environmental Sciences, Sichuan Agricultural University, Chengdu 611130, P.R. China

<sup>d</sup> Chongzhou Meteorological Bureau, Chengdu, 611230, P.R. China

<sup>1</sup> These authors contributed equally to this paper.

\***Correspondence:** Rong Huang ([14624@sicau.edu.cn](mailto:14624@sicau.edu.cn))

Submitted to *Atmospheric Chemistry and Physics*

2023-11-16

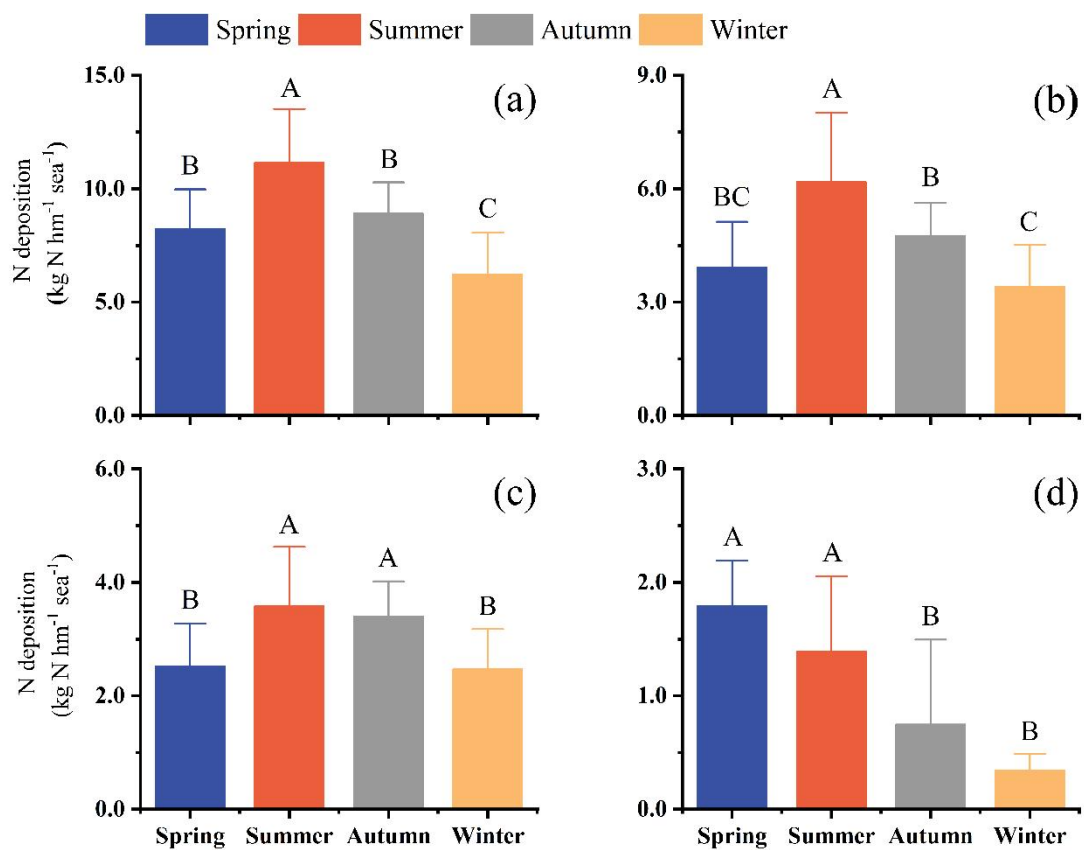

**Fig. S1.** Monthly nitrogen deposition flux of TN-N (a), NH<sub>4</sub><sup>+</sup>-N (b), NO<sub>3</sub><sup>-</sup>-N (c), and DON (d) deposition in four seasons. Different capital letters indicate that the differences among seasons are significant (one-way ANOVA,  $P < 0.05$ )

**Table S1.** Site descriptions.

| Site code | No.  | Latitude      | Longitude    | Elevation (m) | Annual precipitation (mm) | Temperature (°C) | Wind Speed (m s <sup>-1</sup> ) | Relative Humidity (%) | Land-use types     |
|-----------|------|---------------|--------------|---------------|---------------------------|------------------|---------------------------------|-----------------------|--------------------|
| QQ        | 1-1  | E 103.641264° | N 30.548144° | 516.4         | 1044.7                    | 16.73            | 1.19                            | 83.33                 | agricultural areas |
|           | 1-2  | E 103.653045° | N 30.561799° |               |                           |                  |                                 |                       |                    |
|           | 1-3  | E 103.642831° | N 30.561300° |               |                           |                  |                                 |                       |                    |
|           | 1-4* | E 103.643603° | N 30.569282° |               |                           |                  |                                 |                       |                    |
|           | 1-5  | E 103.641286° | N 30.571979° |               |                           |                  |                                 |                       |                    |
| CY        | 2-1* | E 130.670554° | N 30.611027° | 527.0         | 1041.2                    | 16.19            | 1.25                            | 85.94                 | urban areas        |
|           | 2-2  | E 103.669267° | N 30.609439° |               |                           |                  |                                 |                       |                    |
|           | 3-1  | E 103.632746° | N 30.725384° |               |                           |                  |                                 |                       |                    |
| YT        | 3-2  | E 103.634634° | N 30.728741° | 572.8         | 854.3                     | 16.09            | 0.72                            | 84.11                 | rural areas        |
|           | 3-3* | E 103.626781° | N 30.726417° |               |                           |                  |                                 |                       |                    |
|           | 3-4  | E 103.618498° | N 30.723724° |               |                           |                  |                                 |                       |                    |
| HY        | 3-5  | E 103.615494° | N 30.733426° | 658.4         | 1325.4                    | 16.09            | 0.40                            | 81.97                 | rural areas        |
|           | 4-1  | E 103.511853° | N 30.754818° |               |                           |                  |                                 |                       |                    |
|           | 4-2  | E 103.502626° | N 30.757437° |               |                           |                  |                                 |                       |                    |
|           | 4-3  | E 103.497434° | N 30.755556° |               |                           |                  |                                 |                       |                    |
|           | 4-4  | E 103.490267° | N 30.748770° |               |                           |                  |                                 |                       |                    |
| JGM       | 4-5* | E 103.488686° | N 30.755113° | 857.3         | 1251.5                    | 13.39            | 0.60                            | 90.90                 | forest areas       |
|           | 5-1  | E 103.405123° | N 30.770749° |               |                           |                  |                                 |                       |                    |
|           | 5-2  | E 103.400788° | N 30.776981° |               |                           |                  |                                 |                       |                    |
|           | 5-3* | E 103.393450° | N 30.794272° |               |                           |                  |                                 |                       |                    |

**Note:** Numbers with “\*” indicate the site installed with deposition collection devices. QQ, Qiquan; CY, Chongyang; YT, Yuantong; HY, Huaiyuan; JGM, Jiguan Mountain.
